# 1           **Young and Undamaged rMSA Improves the Longevity of Mice**

2

3    Jiaze Tang<sup>1,2,3\*</sup>, Anji Ju<sup>1,2,3\*</sup>, Boya Li<sup>1,2,3\*</sup>, Shaosen Zhang<sup>1,2,3</sup>, Yuanchao Gong<sup>1,2,3</sup>,

4    Boyuan Ma<sup>1,2,3</sup>, Yi Jiang<sup>1,2,3</sup>, Hongyi Liu<sup>1,2,3</sup>, Yan Fu<sup>1,2,3†</sup>, Yongzhang Luo<sup>1,2,3‡</sup>

5

## 6    **Affiliations**

7    1 The National Engineering Laboratory for Anti-Tumor Protein Therapeutics,

8    Tsinghua University, Beijing, China

9    2 Beijing Key Laboratory for Protein Therapeutics, Tsinghua University, Beijing,

10   China

11   3 Cancer Biology Laboratory, School of Life Sciences, Tsinghua University, Beijing,

12   China

13   \* These authors contributed equally to this work.

## 14   **Contact Information**

15   † Corresponding author. Email: [ylo@tsinghua.edu.cn](mailto:ylo@tsinghua.edu.cn) (Yongzhang Luo);

16   [fuyan@tsinghua.edu.cn](mailto:fuyan@tsinghua.edu.cn) (Yan Fu).

17   ‡ Present address: School of Life Sciences, Tsinghua University, 100084, Beijing,

18   China

19

20

21

## 22 **Abstract**

23 Improvement of longevity is an eternal dream of human beings. Here we report  
24 that a single protein recombinant mouse serum albumin (rMSA) improved the lifespan  
25 and healthspan of C57BL/6N mice. The median lifespan extensions were 17.6% for  
26 female and 20.3% for male, respectively. The grip strength of rMSA-treated female and  
27 male mice increased by 29.6% and 17.4%, respectively. Meanwhile, the percentage of  
28 successful escape increased 23.0% in rMSA-treated male mice using the Barnes Maze  
29 test. The rMSA used in this study is young and almost undamaged. We define the  
30 concept “young and undamaged” to any protein without any unnecessary modifications  
31 by four parameters: intact free thiol (if any), no advanced glycation end-product, no  
32 carbonylation, and no homocysteinylation. Here “young and undamaged” rMSA is  
33 much younger and less damaged than the endogenous serum albumin from young mice  
34 at 1.5 months of age. We predict that young and undamaged proteins altogether can  
35 further improve the longevity.

36

## 37 **Keywords**

38 rMSA, longevity, free thiol, advanced glycation end-product, carbonyl, homocysteine.

39

40

41 Longevity is an eternal pursuit of human beings. Tales of passionate seeking for  
42 immortality ran through the whole human history. Ludwig et al reported the extended  
43 lifespan of older rats by younger rats in the parabiosis model for the first time in 1972  
44 [1]. Egerman group and Villeda group respectively found that the muscle strength and  
45 cognitive ability of old mice were improved after the parabiosis surgery with young  
46 mice [2, 3], which suggest that the “mystery” of aging may exist in blood proteins. It is  
47 believed that aging is at least partially caused by the continuous accumulation of  
48 damages or unnecessary modifications of proteins [4, 5, 6], including free thiol  
49 oxidation, carbonylation, advanced glycation end-product (AGE) formation, and  
50 homocysteinylation [7, 8, 9, 10].

51 Human serum albumin (HSA, UniProtKB P02768) is the most abundant protein in  
52 blood plasma with a serum half-life of about 21 days [11]. Damages or unnecessary  
53 modifications of HSA are related to many pathological conditions and increase with  
54 age. Firstly, the single free thiol in Cys-34 residue of HSA has been proposed to account  
55 for approximately 80% of the total free thiols in plasma [12, 13], whose oxidation is  
56 intimately linked with aging and age-related diseases [14, 15, 16]. Secondly, in  
57 oxidative environments, carbonyls are also formed especially on the side chains of Pro,  
58 Arg, Lys and Thr residues in proteins [17, 18]. Elevated carbonyl levels in HSA have  
59 been found to be related to aging and varieties of diseases [19, 20, 21]. Thirdly, the  
60 AGE accumulation of HSA is another important factor found to be involved in aging  
61 [9, 22]. It is widely reported that AGE formation impairs normal functions of albumin  
62 and can induce inflammatory responses, which is connected with aging and the

63 progression of serious diseases [22, 23]. Fourthly, it has been widely reported that  
64 homocysteine (Hcy) increases with age and is associated with age-related degenerative  
65 disorders [10, 24, 25, 26]. HSA is a major target for homocysteinylation, thus it can  
66 efficiently protect other proteins from the toxicity of Hcy [27, 28, 29].

67 Therefore, treatment of freshly prepared recombinant serum albumin with no  
68 damages or unnecessary modifications is most likely to extend lifespan and healthspan.  
69 Here we report that young and undamaged recombinant mouse serum albumin (rMSA)  
70 -treated groups in natural aging mouse model obtained significantly extended lifespan  
71 with increased skeletal muscle strength and cognitive ability compared with saline-  
72 treated groups.

73

## 74 **Materials and Methods**

### 75 **Mice and drug treatments**

76 C57BL/6N mice were purchased from Beijing Vital River Laboratory Animal  
77 Technology Co., Ltd. (a distributor of Charles River Laboratories in China). The mice  
78 transport stress syndrome was carefully avoided during the transportation to the  
79 Laboratory Animal Research Center, Tsinghua University (THU-LARC). All mice were  
80 quarantined for one month to guarantee the adaptation to the new environment and  
81 carried out quality inspection. Animals were kept in a pathogen-free barrier  
82 environment with a 12-h dark-light circle. Room temperature was maintained at 23 °C.  
83 After arrival, mice were fed with irradiation-sterilized JAX-standard breeder chow  
84 (SHOOBREE<sup>®</sup>, Xietong Pharmaceutical Bio-technology Co., Ltd., 1010058) and

85 sterilized water during the entire study.

86 12-month-old middle aged mice were divided into rMSA- or saline-treated group  
87 randomly. More than one kilogram correctly refolded rMSA was kindly supplied by  
88 Shenzhen Protgen, Ltd. The quality of GMP-grade rMSA, expressed by *pichia pastoris*,  
89 was strictly controlled to ensure that the purity is greater than 99%. Most importantly,  
90 host cell proteins (HCPs) were less than 1 µg/g rMSA by ELISA, which means our  
91 rMSA is almost free of HCPs.

92 125 mg/mL of rMSA dissolved in saline was *i.v.* injected slowly. Mice were  
93 weighed before each injection to calculate the dosage, with saline served as the negative  
94 control. Mice were injected with 1.5 mg rMSA per gram of mouse body weight and  
95 isometric saline every 3 weeks as indicated. All animal studies were approved by the  
96 Institutional Animal Care and Use Committee of Tsinghua University (Beijing, China).

#### 97 **Protein levels determination**

98 To determine the blood biochemical parameters, blood samples were collected  
99 from mouse orbital sinus after Avertin<sup>®</sup> (Tribromoethanol, Sigma-Aldrich, T48402)  
100 intraperitoneal injection (400 mg/kg) for anesthesia. Serum samples were collected  
101 after centrifugation at 1,000 × g for 20 min at 4 °C. To collect plasma samples, heparin  
102 sodium salt is added to the fresh blood samples (20 units/mL blood, Sigma-Aldrich,  
103 H3149) to prevent blood clotting followed by centrifugation at 1,000 × g for 30 min at  
104 4 °C. Major blood biochemical parameters of serum samples were determined with an  
105 automatic biochemistry analyzer (Olympus AU 400).

106 To determine the expression level of albumin, mice were euthanized using carbon

107 dioxide after anesthesia. Liver tissue samples were quickly removed and homogenized.  
108 The total RNA from the homogenate was isolated using TRIzol Reagent (Invitrogen,  
109 15596026) and converted into cDNA using the First Strand cDNA Synthesis Kit  
110 (Fermentas, K1622). Quantitative RT-PCR (qRT-PCR) was performed using the  
111 TransStart<sup>®</sup> Top Green qPCR SuperMix (TransGen Biotech Co., AQ131). Relative  
112 quantitation was analyzed using the  $\Delta\Delta$ Ct method. Glyceraldehyde 3-phosphate  
113 dehydrogenase (GAPDH) was used as an internal control. Independent experiments  
114 were repeated in triplicates. The following primers were used: *Alb* forward 5'-  
115 TGCTTTTCCAGGGGTGTGTT, reverse 5'-T TACTTCCTGCACTAATTTGGCA;  
116 *Gapdh* forward 5'- GTTGTCTCCTGCGACTTCA, reverse 5'- GGTGGTCCAGG  
117 GTTTCTTA.

#### 118 **Grip strength test**

119 The grip strength was measured using a grip strength meter (Yiyan Co. Ltd., YLS-  
120 13A). Mice were allowed to hold on to a metal grid and were gently pulled backwards  
121 by the tail at a constant speed until the mice could no longer hold the grid. Each mouse  
122 was given five trials, and the average value was used to represent the grip strength of  
123 an individual mouse. The experiments were carried out in a randomized double-blind  
124 procedure.

#### 125 **Barnes maze assay**

126 Male mice treated with rMSA or isometric saline for 8 months were subjected to  
127 the Barnes maze assay to evaluate spatial memory function. For the Barnes maze assay,  
128 mice were trained to find a hole that connected to a black escape box, which was

129 positioned around the circumference of a circular platform (Shanghai XinRuan, XR-  
130 XB108). The circular platform was 91 cm diameter and 0.4 cm thick, with 20 evenly  
131 distributed 5 cm diameter holes around the edge, with two overhead lights served as an  
132 aversive stimulus. Each trial was recorded by a video camera installed over the platform.  
133 Procedures were similar as described by Rosenfeld et al with modifications [30]. The  
134 results were analyzed by Super Maze software. The experiments were carried out in a  
135 randomized double-blind procedure.

### 136 **Albumin purification**

137 Serum samples of indicated groups were diluted with 20 mM Tris buffer containing  
138 0.15 M NaCl at pH 7.8 before applying to a pre-equilibrated Blue Bestarose™  
139 column (Bestchrom), followed by 3-bed volumes wash of nonspecific binding proteins.  
140 Mouse albumin was eluted by elution buffer (0.2 M NaSCN, pH 8.0), then dialyzed  
141 against PBS and concentrated by Amicon® ultra centrifugal filters with Ultracel-30  
142 regenerated cellulose membrane (MerckMillipore, UFC803008) at 4°C. Protein  
143 concentrations were determined by the Pierce™ BCA Protein Assay Kit according to  
144 manufacturer's instructions (Thermo Scientific, 23227). Samples were analyzed on a  
145 Quadrupole-Time of Flight (Q-TOF) mass spectrometer (Waters, SYNAPT G2-Si)  
146 instrument optimized for high-mass protein molecular weight analysis.

### 147 **Immunofluorescence assay**

148 Frozen sections of mice which were dissected from mice, fixed with cold acetone.  
149 Then these samples were blocked with 10% goat serum and stained with primary  
150 antibodies overnight at 4°C followed by the appropriate secondary fluorescently labeled

151 antibodies at 4 °C overnight. Slides were stained with FITC-conjugated secondary  
152 antibodies, and nuclei were stained by 4',6-diamidino-2-phenylindole (DAPI).  
153 Fluorescence imaging was performed on Nikon A1 laser scanning confocal microscope  
154 and was analyzed with NIS-Elements Software (Nikon) and ImageJ software.

155 The following antibodies were used: mouse monoclonal antibody against  
156 phosphorylated microtubule-associated protein tau (p-tau, UniProtKB P10637. Thermo  
157 Fisher Scientific, MN1020), mouse monoclonal antibody against slow myosin heavy  
158 chain I (MYH1, UniProtKB Q5SX40. Sigma-Aldrich, M8421), rabbit monoclonal  
159 antibody against  $\alpha$ -smooth muscle actin ( $\alpha$ -SMA, UniProtKB P62737. Cell Signaling  
160 Technology, 19245), FITC-conjugated goat polyclonal antibody against mouse IgG  
161 (H+L) (Abcam, ab6785), and FITC-conjugated goat polyclonal antibody against rabbit  
162 IgG (H+L) (Abcam, ab97050).

### 163 **Masson's trichrome staining**

164 Paraformaldehyde-fixed, paraffin-embedded tissue sections from mice were  
165 deparaffinized and rehydrated. Then sections were stained with the Masson's Trichrome  
166 Stain Kit (KeyGEN BioTECH, KGMST-8004). Nuclei stain black, cytoplasm and  
167 muscle fibers stain red, and collagen displays blue coloration.

### 168 **Toluidine Blue O staining**

169 Paraformaldehyde-fixed, paraffin-embedded tissue sections from mice were  
170 deparaffinized and rehydrated. Then sections were stained with the Toluidine Blue O  
171 reagent according to manufacturer's instructions (Solarbio, G3668).

### 172 **Immunohistochemical assay**



173 The rehydrated sections were rinsed three times with PBS and the endogenous  
174 peroxidase was blocked with 3% H<sub>2</sub>O<sub>2</sub>. Then the samples were blocked with 10% goat  
175 serum and incubated with primary antibodies overnight at 4°C followed by the  
176 appropriate secondary HRP-conjugated antibodies at 4°C overnight. Slides were  
177 stained with newly prepared DAB substrate and nuclei were stained by hematoxylin.  
178 The immunohistochemical staining intensity was quantified with ImageJ software.

179 The following antibodies were used: rabbit monoclonal antibody against collagen  
180 I (COL1A1, UniProtKB P11087. Cell Signaling Technology, 91144), rabbit polyclonal  
181 antibody against desmin (UniProtKB P31001. Thermo Fisher Scientific, PA5-16705),  
182 rabbit monoclonal antibody against  $\alpha$ -SMA (Cell Signaling Technology, 19245), and  
183 HRP-conjugated goat polyclonal antibody against rabbit IgG (H+L) (Abcam,  
184 ab205718).

### 185 **Aging-related parameters determination**

186 The Ellman's method was used to determine the content of free thiols [31]. Mouse  
187 serum albumin (MSA, UniProtKB P07724) and rMSA were mixed with equal volumes  
188 of 5, 5'-Dithiobis-(2-nitrobenzoic acid) (DTNB) reagent, respectively. The volume and  
189 concentration of DTNB used in this study were 100  $\mu$ L and 2 mM, respectively. 800  $\mu$ L  
190 Tris buffer (1 M) was added to make the volume of the reaction system reach 1000  $\mu$ L.  
191 Samples were kept at room temperature for 30 min. The fluorescence absorbance was  
192 measured at 412 nm. Carbonyls in protein samples were quantified using the Protein  
193 Carbonyl Content Assay Kit (Abcam, ab126287) according to the manual. Hcy  
194 concentrations were measured by the enzyme-linked immunosorbent assay (ELISA)

195 according to manufacturer's instructions (MEIMIAN, 1213). Concentrations of AGE  
196 were measured with an ELISA kit according to manufacturer's instructions (CLOUD-  
197 CLONE Co., CEB353Ge).

## 198 **Statistical analysis**

199 The Kaplan–Meier method was used for survival analysis and the survival curves  
200 were compared by using the log-rank (Mantel-Cox) test. The variance across samples  
201 was analyzed using Kolmogorov-Smirnov (K-S) test and Levene's test, followed by 2-  
202 tailed unpaired Student *t*-test, where  $p < 0.05$  is considered significant. Statistical  
203 analysis and diagramming were carried out by the Graphpad Prism 6.01 software unless  
204 otherwise noted.

205

## 206 **Results**

### 207 **rMSA treatment increased the longevity in mice**

208 In order to verify whether rMSA treatment can extend the lifespan of mice, 12-  
209 month-old middle aged C57BL/6N mice were chosen as natural aging models, and were  
210 *i.v.* injected with 1.5 mg rMSA per gram of body weight or isometric saline every 3  
211 weeks until natural death. The lifespans of rMSA-treated mice were improved  
212 significantly (Fig. 1A), wherein 17.6% for females (3.4 months increased,  $p = 0.0164$ ,  
213 Fig. 1B) and 20.3% for males (3.9 months increased,  $p = 0.0342$ , Fig. 1C). Changes in  
214 the appearance of both sexes were observed when the median lifespan was reached.  
215 Interestingly, mice treated with rMSA had glossier and thicker fur than saline-treated  
216 mice (Fig. 1D).

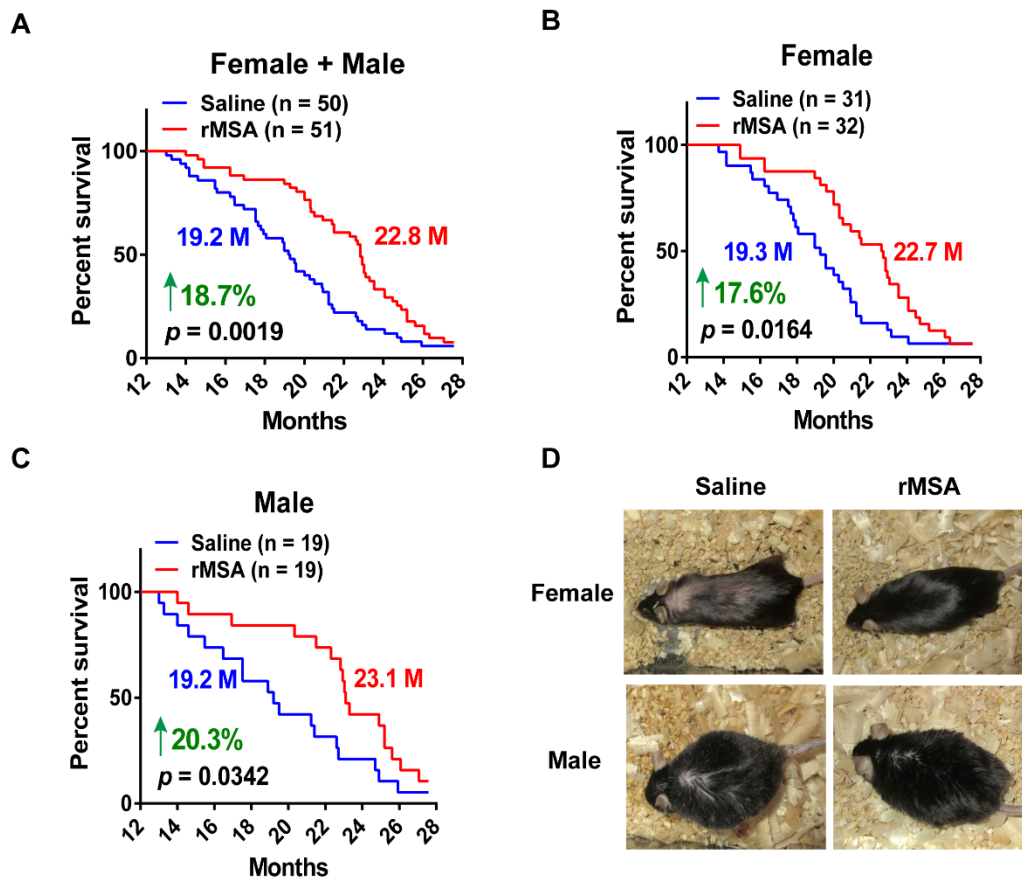

217

218 **Figure 1. rMSA treatment increased the longevity in mice**

219 (A-C) Survival curves of female (B) and male (C) mice treated with 1.5 mg rMSA per gram of  
220 body weight or isometric saline every 3 weeks. Median survivals (in months, M) and percentage  
221 increases are indicated.  $p$ -value was calculated by the log-rank (Mantel-Cox) test. n, number of  
222 mice used for each analysis. (D) Representative images of aged mice injected with rMSA or  
223 saline.

224

225 Moreover, qRT-PCR and blood biochemical analyses showed that both mRNA  
226 levels in the liver (Fig. S1A) and protein (Fig. S1B) levels in plasma of albumin  
227 underwent slight fluctuations before returning to normal within 8 days after the first  
228 injection. Major blood biochemical parameters remained constant in normal levels (Fig.

229 S2A-N). In addition, to confirm whether the long-term treatment of saline or rMSA has  
230 various degrees of damages to organs, tissue sections of liver, kidney and heart were  
231 examined for any histopathological changes. Levels of  $\alpha$ -SMA, a marker of  
232 myofibroblast activation in organ fibrosis [32], were measured in kidney (Fig. S3A-C),  
233 which showed no significant difference between saline- and rMSA-treated groups. To  
234 further verify the degree of renal fibrosis, Masson's trichrome staining (Fig. S3D-F) and  
235 immunohistochemical staining of COL1A1 (Fig. S3G-I) were performed, which also  
236 showed no significant difference in kidneys of saline- and rMSA-treated mice. In the  
237 liver,  $\alpha$ -SMA (Fig. S3J-L) and desmin (Fig. S3M-O) levels were measured to assess  
238 fibrosis levels, and no significantly differences were observed either. As for the heart,  
239 there was no significant difference in the collagen volume fraction of cardiac muscle  
240 by Masson's trichrome staining (Fig. S3P-R). Furthermore, the lifespan of mice varies  
241 in different laboratories because of the different feeding conditions. The lifespans of the  
242 saline-treated mice in our study were similar to those of the unmanipulated wild type  
243 C57BL/6 mice in other studies [33, 34]. These phenomena suggest that rMSA treatment  
244 is safe for long-term use and can extend the lifespan of C57BL/6 mice.

245

#### 246 **rMSA enhanced the function of skeletal muscle in mice**

247 The elongation in mice lifespan triggered us to further explore whether the  
248 healthspan could also be improved. As the dysfunction in skeletal muscle was  
249 commonly observed during aging, we first detected the changes of grip strength in mice  
250 treated with rMSA or isometric saline for 8 months. rMSA-treated mice exhibited

251 significantly increased forelimb grip strength from 177.9 g to 230.5 g (29.6% increased,  
252  $p = 0.0002$ ) in females and from 189.6 g to 222.5 g (17.4% increased,  $p = 0.0069$ ) in  
253 males, as compared to saline-treated mice (Fig. 2A, B).

254 In order to evaluate the effect of rMSA injection on the *in vivo* skeletal muscle size  
255 and quality, we further performed histological analysis on gastrocnemius muscle (Fig.  
256 2C). We found that the cross-sectional area of myofibers in rMSA-treated female mice  
257 were significantly increased (79.1% increased,  $p = 0.0014$ ) than those in the saline  
258 group (Fig. 2D). However, similar phenomenon was not observed in male mice (Fig.  
259 2E). We next investigated the expression level of slow MYH1 in rMSA and saline-  
260 treated group, another important parameter to evaluate the muscle strength (Fig. 2F).  
261 Male mice treated with rMSA presented significantly more slow MYH1 positive fibers  
262 than saline-treated mice (30.5% increased,  $p = 0.0477$ , Fig. 2H), while similar results  
263 were not obtained in female mice (Fig. 2G). Taken together, it was demonstrated that  
264 rMSA treatment enhanced the cross-sectional area of gastrocnemius fibers in female  
265 mice, and increased the level of slow MYH1 in male mice. We observed that rMSA had  
266 different effects on skeletal muscle of male and female mice, the variance of hormones  
267 and metabolic mechanisms may be one explanation for these differences. Interestingly,  
268 the improvement of skeletal muscle by rMSA treatment was coincident with that of the  
269 lifespan, demonstrating that rMSA most likely regulates both the lifespan and the  
270 healthspan based on the same fundamental principles.

271 V

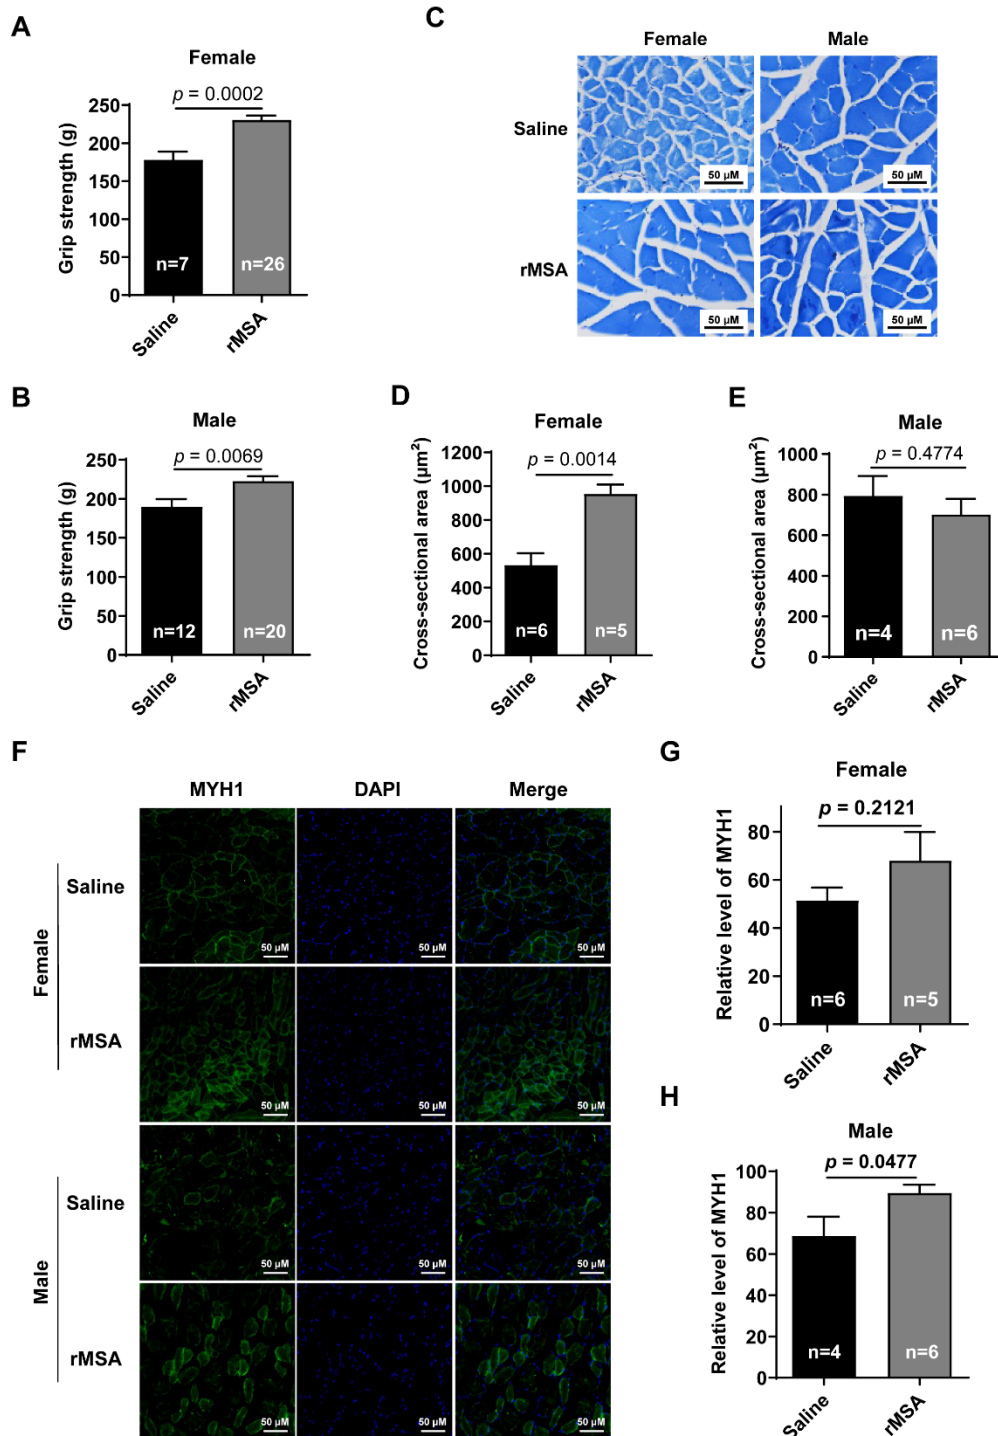

272

273 **Figure 2. The effects of rMSA on the function of skeletal muscle in mice**

274 (A and B) The grip strength of female (A) and male (B) mice. (C) The Toluidine Blue O staining  
 275 of gastrocnemius muscle. Scale bar, 50  $\mu\text{m}$ . (D and E) The cross-sectional area of myofibers in  
 276 female (D) and male (E) mice. (F) The immunofluorescence staining for MYH1 (green) and  
 277 DAPI (blue) in mice. Scale bar, 50  $\mu\text{m}$ . (G and H) The relative level of MYH1 in female (G)  
 278 and male (H) mice. Mice were treated with rMSA 1.5 mg per gram of body weight or isometric

279 saline every 3 weeks for 8 months. All graphs represent mean with SEM, with  $p$  values  
280 calculated by the two-tail  $t$  test.  $n$ , number of mice used for each analysis.

281

## 282 **rMSA improved the spatial learning and memory of mice**

283 We next investigated the effects of rMSA on aging-related impairment of memory  
284 using the Barnes Maze tests in male mice. rMSA-treated group exhibited a dramatic  
285 increase in the percentage of successful escape (73.2% *v.s.* 50.2%, 23.0% increased,  $p$   
286 = 0.0016) compared to that of the saline-treated group (Fig. 3A, C). Meanwhile, the  
287 rMSA-treated male mice displayed significantly reduced primary escape latency (85.8  
288 sec *v.s.* 133.4 sec, 47.6 sec faster,  $p < 0.0001$ ) than the saline-treated mice (Fig. 3B, D).  
289 All these results demonstrated that rMSA treatment significantly improved the ability  
290 of spatial learning and memory in aging mice.

291 We then evaluated the histological changes associated with the memory using  
292 these groups of mice. Excitingly, the results of immunofluorescence staining in the  
293 cortex showed that the level of phosphorylated-tau (p-tau) was significantly decreased  
294 by rMSA treatment in male mice than that of the saline group (39.1% decreased,  $p =$   
295 0.0439, Fig. 3E, F). However, there was no significant discrepancy in female groups,  
296 though the level of p-tau in rMSA-treated mice was lower than that of the saline-treated  
297 mice (19.5% decreased,  $p = 0.1249$ , Fig. 3G). In sum, injection of rMSA decreased the  
298 p-tau level of mice (30.1% decreased,  $p = 0.0059$ , Fig. 3H), especially male mice.  
299 Furthermore, we suggest that effects of rMSA injection on memory improvement can  
300 relieve neurodegenerative disease during aging process.



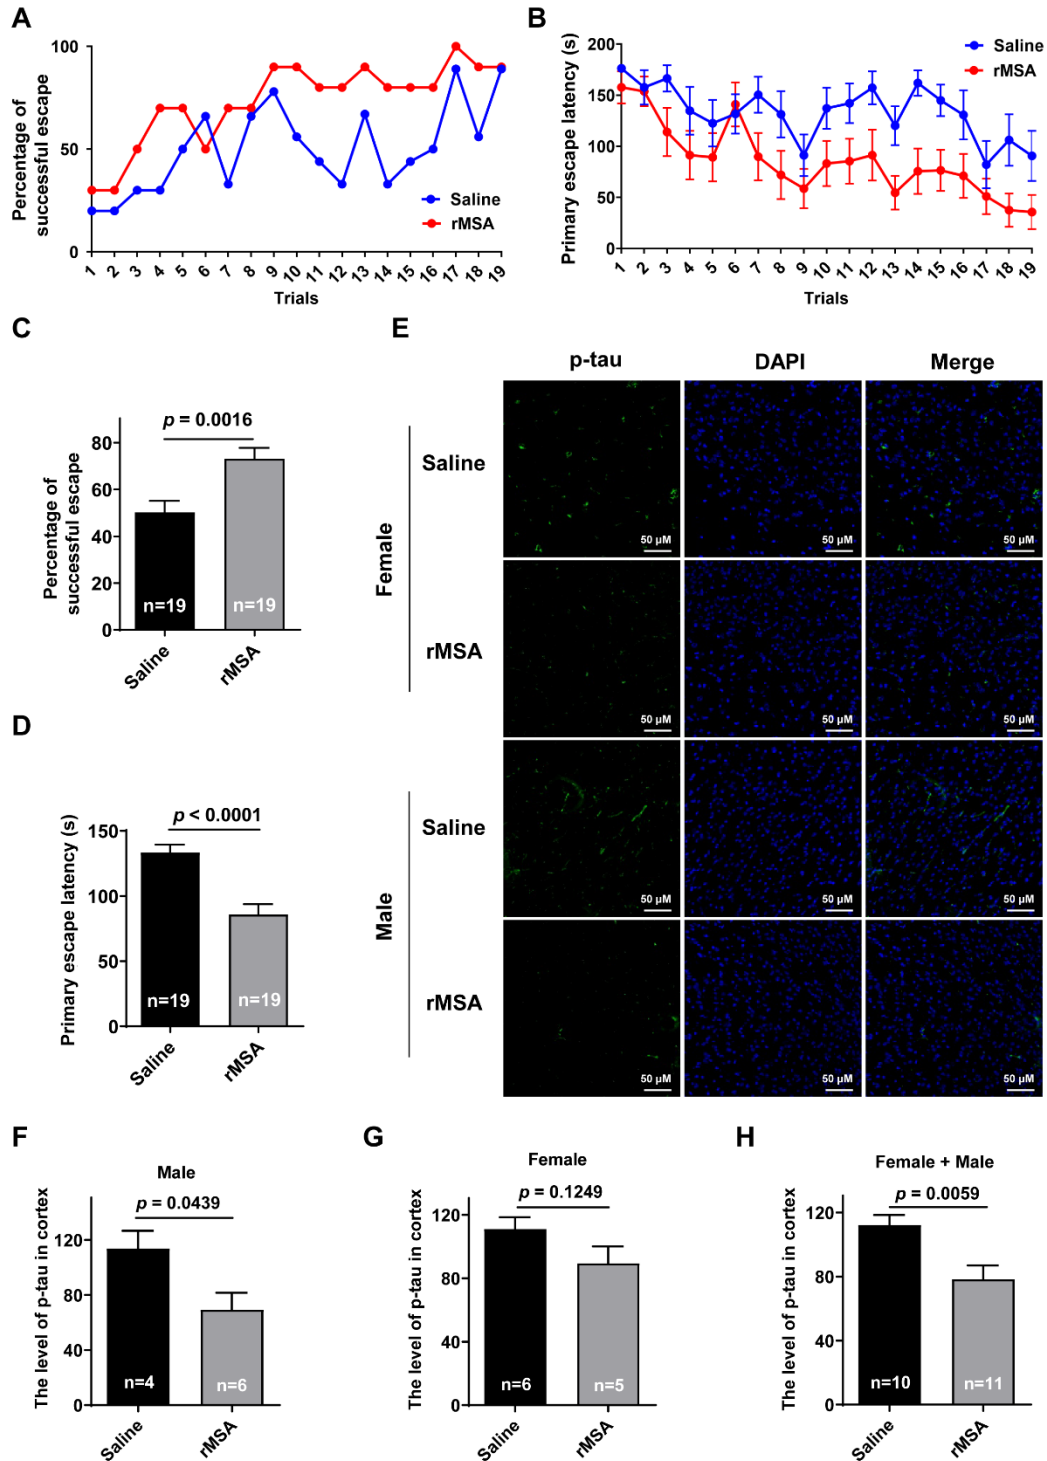

301

302 **Figure 3. Effects of rMSA on the spatial learning and memory of mice**

303 (A and B) Measurements of the percentage of successful escape (A) and the primary escape  
 304 latency (B) of male mice. (C) The average of (A). n, the number of trials. (D) The average of  
 305 (B). n, the number of trials. (E) The representative images of p-tau in the mice cortex. Scale  
 306 bar, 50  $\mu$ m. (F-H) The quantitative results of p-tau (green) and DAPI (blue) in male (F), female  
 307 (G) and female + male (H) mice. n, the number of mice used for analysis. Mice were treated



308 with rMSA 1.5 mg per gram of body weight or isometric saline every 3 weeks for 8 months.

309 All graphs represent mean with SEM, with  $p$  values calculated by the two-tail  $t$  test.

310

### 311 **rMSA treatment improved four parameters related to aging**

312 We proposed for the first time that the longevity can be enhanced by improving the  
313 status of free thiol, carbonyl, AGE, and Hcy which are the four parameters defining a  
314 young and undamaged protein. To verify this hypothesis, endogenous serum albumin  
315 samples of mice at 1.5-, 12-, and 28 months of age were purified respectively for  
316 comparison. During the aging process, serum albumin undergoes a series of changes in  
317 the four parameters: decreased level of free thiol and increased levels of carbonyl, AGE,  
318 and Hcy. The rMSA used in this study is even younger and less damaged than  
319 endogenous serum albumin from the young mice even at 1.5 months of age. The rMSA  
320 contains more free thiols (18.1 % increased,  $p = 0.0571$ ) (Fig. 4A), equivalent level of  
321 carbonyl (Fig. 4B), less AGE (37.7% decreased,  $p = 0.0589$ ) (Fig. 4C), and less Hcy  
322 (not detected in rMSA,  $p = 0.1215$ ) (Fig. 4D). In addition, we need to emphasize here  
323 that no other damage was observed in our samples, because the molecular weight  
324 measured by mass spectrometry (Fig. S4A) is exactly the same as the theoretically  
325 calculated value [35]. In contrast, higher molecular weights were observed in  
326 endogenous albumin samples purified from mice serum at 1.5 months of age (Fig. S4B),  
327 which demonstrated more modifications on mouse serum albumin compared with  
328 rMSA. In sum, rMSA used in this study is not only “young” but also almost  
329 “undamaged”, which endows rMSA to offer more protection against unnecessary  
330 modifications and damages, and suggest that the four parameters could monitor the

331 aging process. Here, “young” means that the rMSA is much fresher than the endogenous  
332 albumin from young mice at the age of only 1.5 months analyzed by the 4 parameters  
333 (free thiol, carbonyl, AGE, and Hcy). “Undamaged” theoretically means intact free  
334 thiol, no AGE, no carbonylation, and no homocysteinylation. In reality, due to the  
335 preparation process and detection methods, it is almost impossible to get such perfect  
336 sample.

337 In order to explore how young and undamaged rMSA improved the lifespan and  
338 healthspan of mice, 12-month-old mice were treated with 1.5 mg rMSA per gram of  
339 body weight or isometric saline every 3 weeks for 8 months. All serum samples were  
340 collected 21 days after the last injection. Compared with the saline-treated mice, the  
341 albumin from the rMSA-treated mice contained more free thiols (11.6% increased,  $p =$   
342 0.1635), much lower levels of carbonyl (22.1% decreased,  $p = 0.0230$ ), AGE (24.4%  
343 decreased,  $p = 0.0243$ ), and Hcy (42.6% decreased,  $p = 0.0370$ ) (Fig. 4E-H). Taken  
344 together, young and undamaged rMSA provides a powerful protective function against  
345 oxidation of free thiol, carbonylation, AGE formation, and homocysteinylation.

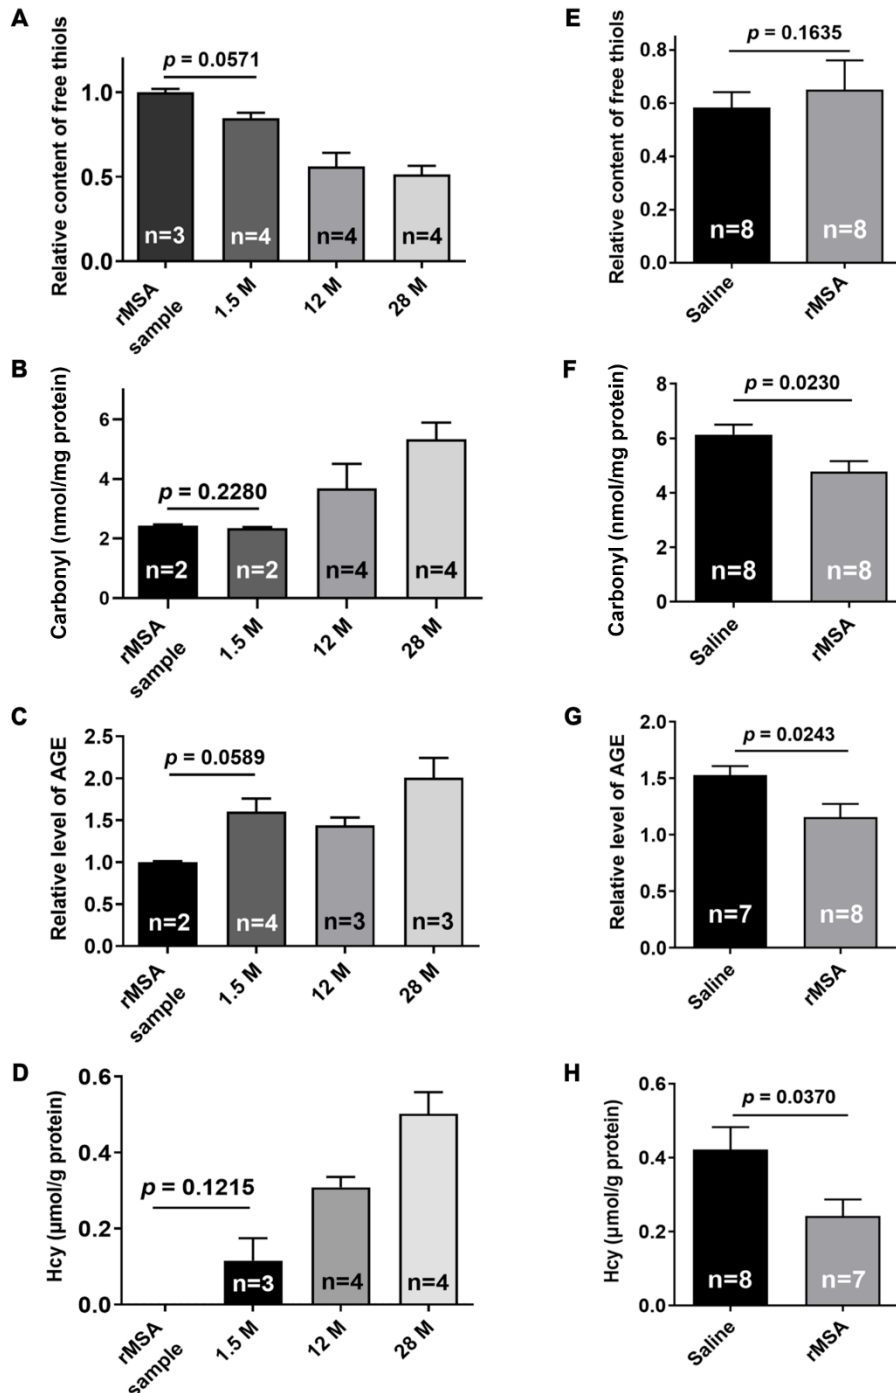

346

347 **Figure 4. rMSA treatment improved four parameters related to aging**

348 (A-D) The level of free thiol (A), carbonyl (B), AGE (C), and Hcy (D) of rMSA and endogenous

349 albumin from serum samples of mice at 1.5-, 12-, and 28 months of age. (E-H) The level of

350 free thiol (E), carbonyl (F), AGE (G), and Hcy (H) of endogenous albumin of mice treated with

351 body weight-adjusted dosage of rMSA or isometric saline. All graphs represent mean with SEM,

352 with p values calculated by the two-tail t test. n, number of mice used for each analysis.

353

## 354 **Discussion**

355 Results showed that young and undamaged rMSA significantly improved the  
356 lifespan of mice with enhanced grip strength and memory. Our separate ongoing studies  
357 show that various physiological properties could be improved, such as immune  
358 responses, metabolic processes and cardiovascular functions. Further explorations will  
359 contribute to better understanding of the mechanism of young and undamaged rMSA  
360 on longevity.

361 Certainly, we realized that effects of rMSA and endogenous albumin on the  
362 longevity of mice should be compared in parallel. In order to perform this experiment,  
363 endogenous albumin should be prepared from mice at different ages ranging from very  
364 young to very old, whenever rMSA was used. However, endogenous mouse serum  
365 albumin of sufficient purity is not commercially available. Moreover, at least 20,000  
366 mice at different ages were needed to purify sufficient amount of albumin at a purity  
367 greater than 99%, which is unethical.

368 A clinical trial whose purpose was to evaluate the beneficial effects of infusions of  
369 plasma from young donors (16-25 years old) to older adults ( $\geq 35$  years old) was  
370 initiated in 2016 in the USA, but no result has been released so far (ClinicalTrials.gov  
371 Identifier: NCT02803554). Most recently, Conboy group reported rejuvenation of  
372 muscle, liver, and hippocampus of mice by exchanging old blood plasma with saline  
373 containing 5% endogenous albumin [36]. Pishel group reported that the injection of the  
374 plasma from young mice (2 to 4 months) cannot improve the median lifespan of middle-  
375 aged mice (10 to 12 months) [37]. Another clinical trial initiated by Grifols

376 (ClinicalTrials.gov Identifier: NCT01561053, NCT00742417) showed that the plasma  
377 exchange with the replacement of human serum albumin significantly improved the  
378 cognitive performance in patients with Alzheimer's disease compared with the control  
379 group [38]. However, neither of these studies used young and undamaged recombinant  
380 serum albumin, which makes the results not directly comparable.

381 In 2014, Wyss-Coray group reported that plasma from young mice can improve  
382 the learning and memory of old mice. Since albumin occupies about 50% of total  
383 plasma proteins, it most likely plays the most important role in this process, which was  
384 exactly what we found here. In order to achieve the maximal effect of rMSA on  
385 longevity, a variety of measures including optimal dosage, frequency, and drug delivery  
386 methods are being investigated. We predict that the concept of young and undamaged  
387 albumin increasing the longevity can also be applied to any other proteins such as  
388 immunoglobulins, fibrinogen, transferrin, transthyretin, and haptoglobin which are  
389 major plasma proteins.

390 It was well documented that the 4 parameters including free thiol, carbonyl, AGE,  
391 and Hcy are closely related to various diseases such as diabetes mellitus, cardiovascular  
392 diseases, adiposity, and Alzheimer's disease [10, 23, 29, 39, 40, 41]. We discovered that  
393 longevity is intimately related to these four major parameters, based on which we  
394 defined the status of rMSA as "young and undamaged". In addition, more parameters  
395 will be explored to enrich the definition of "young and undamaged" status in the future.  
396 It will be remarkable to see that a single young and undamaged protein (either  
397 recombinant or non-recombinant) HSA can increase the longevity of human beings,

398 which will be initiated in the near future. If so, the combination of young and  
399 undamaged major plasma proteins can further increase the longevity. Ideally, all of the  
400 young and undamaged plasma proteins altogether can increase the longevity to the  
401 largest extent.

402

### 403 **Abbreviations**

404 HSA, human serum albumin. AGE, advanced glycation end-product. Hcy,  
405 homocysteine. rMSA, recombinant mouse serum albumin. p-tau, phosphorylated  
406 microtubule-associated protein tau. MYH1, myosin heavy chain I.  $\alpha$ -SMA,  $\alpha$ -smooth  
407 muscle actin. COL1A1, collagen I. HCP, host cell proteins. qRT-PCR, quantitative RT-  
408 PCR. ELISA, enzyme-linked immunosorbent assay. GAPDH, glyceraldehyde 3-  
409 phosphate dehydrogenase. DAPI, 4',6-diamidino-2-phenylindole. DTNB, 5, 5'-  
410 Dithiobis-(2-nitrobenzoic acid). Q-TOF, Quadrupole-Time of Flight. K-S test,  
411 Kolmogorov-Smirnov test.

412

### 413 **Protein accession IDs (UniProtKB)**

414 HSA: P02768

415 MSA: P07724

416 TAU: P10637

417 MYH1: Q5SX40

418  $\alpha$ -SMA: P62737

419 COL1A1: P11087

420 Desmin: P31001

421

## 422 **Author contributions**

423 Yongzhang Luo, Yan Fu, Jiaze Tang, Anji Ju, Boya Li, Shaosen Zhang, and  
424 Yuanchao Gong designed the study; Yongzhang Luo, Yan Fu, Jiaze Tang, Anji Ju, and  
425 Boya Li wrote the manuscript, which was commented on by all authors; Jiaze Tang,  
426 Anji Ju, Boya Li, Shaosen Zhang, Yuanchao Gong, Boyuan Ma, Yi Jiang, and Hongyi  
427 Liu performed most of the experiments; Jiaze Tang, Anji Ju, Boya Li, Shaosen Zhang,  
428 Yuanchao Gong, Boyuan Ma, Yi Jiang and Hongyi Liu performed animal experiments;  
429 Jiaze Tang, Anji Ju, Boya Li, Shaosen Zhang, and Yuanchao Gong performed  
430 histological experiments; Jiaze Tang, Anji Ju, Boya Li, Yuanchao Gong, Shaosen Zhang,  
431 and Hongyi Liu performed biochemical experiments; Jiaze Tang, Anji Ju, Boya Li,  
432 Shaosen Zhang, Yuanchao Gong, Boyuan Ma, and Yi Jiang performed molecular  
433 experiments.

434

## 435 **Acknowledgments**

436 We thank all the members of Shenzhen Protgen, Ltd. for kindly providing rMSA.  
437 Q-TOF-MS and additional technical assistance were performed by the Technology  
438 Center of Protein Research, Tsinghua University. We are also grateful to Laboratory  
439 Animal Research Center, Tsinghua University. We thank all the members in the Luo  
440 laboratory for their technical supports and insightful suggestions on this study.

441

442 **Conflict of interest**

443 The authors declare no competing interests.

444

445 **Funding**

446 This research was supported by the Science and Technology Major Project (No.

447 20181821569) and Self-Topic Fund of Tsinghua University (No. 20191080585).

448



449 **References**

- 450 1. Ludwig FC and Elashoff RM. Mortality in syngeneic rat parabionts of different  
451 chronological age. *Trans N Y Acad Sci.* 1972; 34(7):582-587.
- 452 2. Egerman MA, Cadena SM, Gilbert JA, Meyer A, Nelson HN, Swalley SE, Mallozzi  
453 C, Jacobi C, Jennings LL, Clay I, Laurent G, Ma S and Brachat S, et al. GDF11  
454 increases with age and inhibits skeletal muscle regeneration. *Cell Metab.* 2015;  
455 22(1):164-174.
- 456 3. Villeda SA, Plambeck KE, Middeldorp J, Castellano JM, Mosher KI, Luo J, Smith  
457 LK, Bieri G, Lin K, Berdnik D, Wabl R, Udeochu J and Wheatley EG, et al. Young  
458 blood reverses age-related impairments in cognitive function and synaptic  
459 plasticity in mice. *Nat Med.* 2014; 20(6):659-663.
- 460 4. Yin D and Chen K. The essential mechanisms of aging: Irreparable damage  
461 accumulation of biochemical side-reactions. *Exp Gerontol.* 2005; 40(6):455-465.
- 462 5. Lehallier B, Gate D, Schaum N, Nanasi T, Lee SE, Yousef H, Moran LP, Berdnik  
463 D, Keller A, Verghese J, Sathyan S, Franceschi C and Milman S, et al. Undulating  
464 changes in human plasma proteome profiles across the lifespan. *Nat Med.* 2019;  
465 25(12):1843-1850.
- 466 6. Rattan SI. Increased molecular damage and heterogeneity as the basis of aging. *Biol*  
467 *Chem.* 2008; 389(3):267-272.
- 468 7. Stadtman ER, Van Remmen H, Richardson A, Wehr NB and Levine RL.  
469 Methionine oxidation and aging. *Biochim Biophys Acta.* 2005; 1703(2):135-140.
- 470 8. Pandey KB, Mehdi MM, Maurya PK and Rizvi SI. Plasma protein oxidation and its

- 471 correlation with antioxidant potential during human aging. *Dis Markers*. 2010;  
472 29(1):31-36.
- 473 9. Uribarri J, Cai W, Peppas M, Goodman S, Ferrucci L, Striker G and Vlassara H.  
474 Circulating glycotoxins and dietary advanced glycation end products: two links to  
475 inflammatory response, oxidative stress, and aging. *J Gerontol A Biol Sci Med Sci*.  
476 2007; 62(4):427-433.
- 477 10. Ostrakhovitch EA and Tabibzadeh S. Homocysteine and age-associated disorders.  
478 *Ageing Res Rev*. 2019; 49:144-164.
- 479 11. Rothschild MA, Oratz M and Schreiber SS. Serum albumin. *Hepatology*. 1988;  
480 8(2):385-401.
- 481 12. Garcia Martinez R, Caraceni P, Bernardi M, Gines P, Arroyo V and Jalan R.  
482 Albumin: Pathophysiologic basis of its role in the treatment of cirrhosis and its  
483 complications. *Hepatology*. 2013; 58(5):1836-1846.
- 484 13. Carballal S, Radi R, Kirk MC, Barnes S, Freeman BA and Alvarez B. Sulfenic acid  
485 formation in human serum albumin by hydrogen peroxide and peroxynitrite.  
486 *Biochemistry-US*. 2003; 42(33):9906-9914.
- 487 14. Turell L, Radi R and Alvarez B. The thiol pool in human plasma: The central  
488 contribution of albumin to redox processes. *Free Radical Bio Med*. 2013; 65:244-  
489 253.
- 490 15. Leto S, Yiengst MJ and Barrows CJ. The effect of age and protein deprivation on  
491 the sulfhydryl content of serum albumin. *J Gerontol*. 1970; 25(1):4-8.
- 492 16. Era S, Kuwata K, Imai H, Nakamura K, Hayashi T and Sogami M. Age-related

- 493 change in redox state of human serum albumin. *Biochim Biophys Acta*. 1995;  
494 1247(1):12-16.
- 495 17. Berlett BS and Stadtman ER. Protein oxidation in aging, disease, and oxidative  
496 stress. *J Biol Chem*. 1997; 272(33):20313-20316.
- 497 18. Chevion M, Berenshtein E and Stadtman ER. Human studies related to protein  
498 oxidation: protein carbonyl content as a marker of damage. *Free Radic Res*. 2000;  
499 33 Suppl: S99-S108.
- 500 19. Colombo G, Clerici M, Giustarini D, Rossi R, Milzani A and Dalle-Donne I. Redox  
501 albuminomics: oxidized albumin in human diseases. *Antioxid Redox Sign*. 2012;  
502 17(11):1515-1527.
- 503 20. Jana CK, Das N and Sohal RS. Specificity of age-related carbonylation of plasma  
504 proteins in the mouse and rat. *Arch Biochem Biophys*. 2002; 397(2):433-439.
- 505 21. Wang Z, Wang Y, Liu H, Che Y, Xu Y and E L. Age-related variations of protein  
506 carbonyls in human saliva and plasma: is saliva protein carbonyls an alternative  
507 biomarker of aging? *Age*. 2015; 37(3).
- 508 22. Byun K, Yoo Y, Son M, Lee J, Jeong GB, Park YM, Salekdeh GH and Lee B.  
509 Advanced glycation end-products produced systemically and by macrophages: A  
510 common contributor to inflammation and degenerative diseases. *Pharmacol Ther*.  
511 2017; 177:44-55.
- 512 23. Schalkwijk CG and Stehouwer C. Methylglyoxal, a highly reactive dicarbonyl  
513 compound, in diabetes, its vascular complications, and other age-related diseases.  
514 *Physiol Rev*. 2020; 100(1):407-461.

- 515 24. McCully KS. Vascular pathology of homocysteinemia: implications for the  
516 pathogenesis of arteriosclerosis. *Am J Pathol.* 1969; 56(1):111-128.
- 517 25. McLean RR, Jacques PF, Selhub J, Tucker KL, Samelson EJ, Broe KE, Hannan  
518 MT, Cupples LA and Kiel DP. Homocysteine as a predictive factor for hip fracture  
519 in older persons. *N Engl J Med.* 2004; 350(20):2042-2049.
- 520 26. Seshadri S, Beiser A, Selhub J, Jacques PF, Rosenberg IH, D'Agostino RB, Wilson  
521 PW and Wolf PA. Plasma homocysteine as a risk factor for dementia and  
522 Alzheimer's disease. *N Engl J Med.* 2002; 346(7):476-483.
- 523 27. Jakubowski H. Homocysteine is a protein amino acid in humans. Implications for  
524 homocysteine-linked disease. *J Biol Chem.* 2002; 277(34):30425-30428.
- 525 28. Glowacki R and Jakubowski H. Cross-talk between Cys34 and lysine residues in  
526 human serum albumin revealed by N-homocysteinylation. *J Biol Chem.* 2004;  
527 279(12):10864-10871.
- 528 29. Jakubowski H. Homocysteine modification in protein structure/function and human  
529 disease. *Physiol Rev.* 2019; 99(1):555-604.
- 530 30. Rosenfeld CS and Ferguson SA. Barnes maze testing strategies with small and large  
531 rodent models. *J Vis Exp.* 2014; (84):e51194.
- 532 31. Ellman GL. A colorimetric method for determining low concentrations of  
533 mercaptans. *Arch Biochem Biophys.* 1958; 74(2):443-450.
- 534 32. Liu Y. Cellular and molecular mechanisms of renal fibrosis. *Nat Rev Nephrol.* 2011;  
535 7(12):684-696.
- 536 33. Sohal R, Ku H, Agarwal S, Forster M and Lal H. Oxidative damage, mitochondrial

- 537 oxidant generation and antioxidant defenses during aging and in response to food  
538 restriction in the mouse. *Mech Ageing Dev.* 1994; 74(1-2):121-133.
- 539 34. Conti B, Sanchez-Alavez M, Winsky-Sommerer R, Morale MC, Lucero J, Brownell  
540 S, Fabre V, Huitron-Resendiz S, Henriksen S, Zorrilla EP, de Lecea L and Bartfai  
541 T. Transgenic mice with a reduced core body temperature have an increased life  
542 span. *Science.* 2006; 314(5800):825-828.
- 543 35. Sheng J, Wang Y, Turesky RJ, Kluetzman K, Zhang Q and Ding X. Novel  
544 transgenic mouse model for studying human serum albumin as a biomarker of  
545 carcinogenic exposure. *Chem Res Toxicol.* 2016; 29(5):797-809.
- 546 36. Mehdipour M, Skinner C, Wong N, Lieb M, Liu C, Etienne J, Kato C, Kiproff D,  
547 Conboy MJ and Conboy IM. Rejuvenation of three germ layers tissues by  
548 exchanging old blood plasma with saline-albumin. *Aging (Albany NY).* 2020;  
549 12(10):8790-8819.
- 550 37. Shytikov D, Balva O, Debonneuil E, Glukhovskiy P, and Pishel I. Aged mice  
551 repeatedly injected with plasma from young mice: a survival study. *Biores Open*  
552 *Access.* 2014 Oct 1; 3(5): 226-232.
- 553 38. Boada M, López OL, Olazarán J, Núñez L, Pfeffer M, Paricio M, Lorites J, Piñol-  
554 Ripoll G, Gámez JE, Anaya F, Kiproff D, Lima J and Grifols C, et al. A randomized,  
555 controlled clinical trial of plasma exchange with albumin replacement for  
556 Alzheimer's disease: Primary results of the AMBAR Study. *Alzheimer's Dement.*  
557 2020; 16:1412-1425
- 558 39. Abdulle AE, Bourgonje AR, Kieneker LM, Koning AM, la Bastide-van GS,

- 559 Bulthuis M, Dijkstra G, Faber KN, Dullaart R, Bakker S, Gans R, Gansevoort RT  
560 and Mulder DJ, et al. Serum free thiols predict cardiovascular events and all-cause  
561 mortality in the general population: a prospective cohort study. *Bmc Med.* 2020;  
562 18(1):130.
- 563 40. Yaffe K, Lindquist K, Schwartz AV, Vitartas C, Vittinghoff E, Satterfield S,  
564 Simonsick EM, Launer L, Rosano C, Cauley JA and Harris T. Advanced glycation  
565 end product level, diabetes, and accelerated cognitive aging. *Neurology.* 2011;  
566 77(14):1351-1356.
- 567 41. Damba T, Bourgonje AR, Abdulle AE, Pasch A, Sydor S, van den Berg EH,  
568 Gansevoort RT, Bakker S, Blokzijl H, Dullaart R, van Goor H and Moshage H.  
569 Oxidative stress is associated with suspected non-alcoholic fatty liver disease and  
570 all-cause mortality in the general population. *Liver Int.* 2020.  
571

572 **Supplemental Figure**

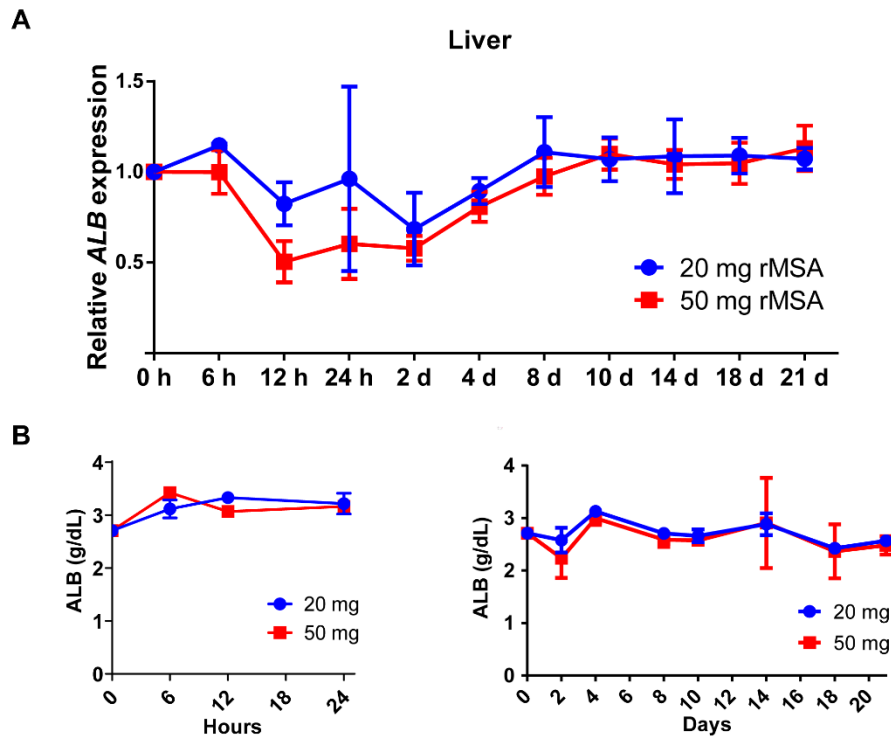

573

574 **Figure S1. Effects of rMSA injection on the levels of albumin in mice**

575 **(A)** Dynamic expression levels of the albumin gene in the liver determined by qRT-PCR after  
576 the injection with 50 mg rMSA per mouse (n = 3). **(B)** Dynamic protein levels of the serum  
577 albumin within 1 day (left) and 2-21 days (right) after the injection with 20- or 50 mg rMSA  
578 per mouse (n = 3). All graphs represent mean with SEM.

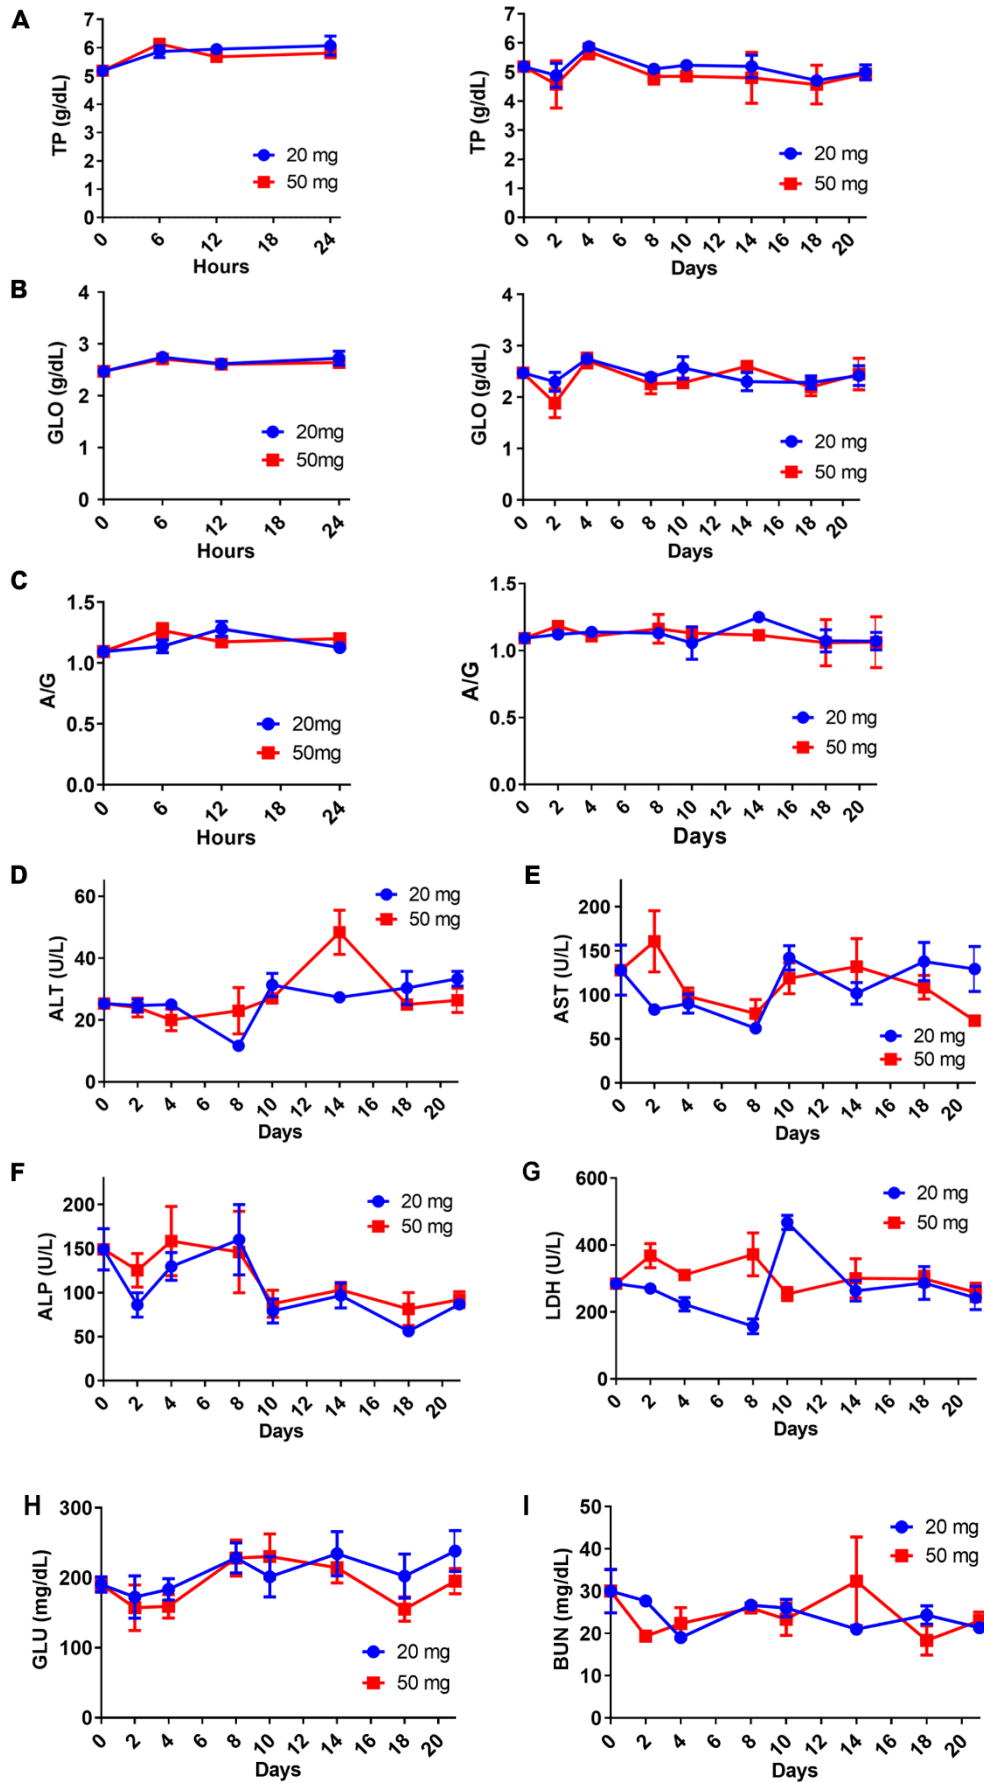

579

580



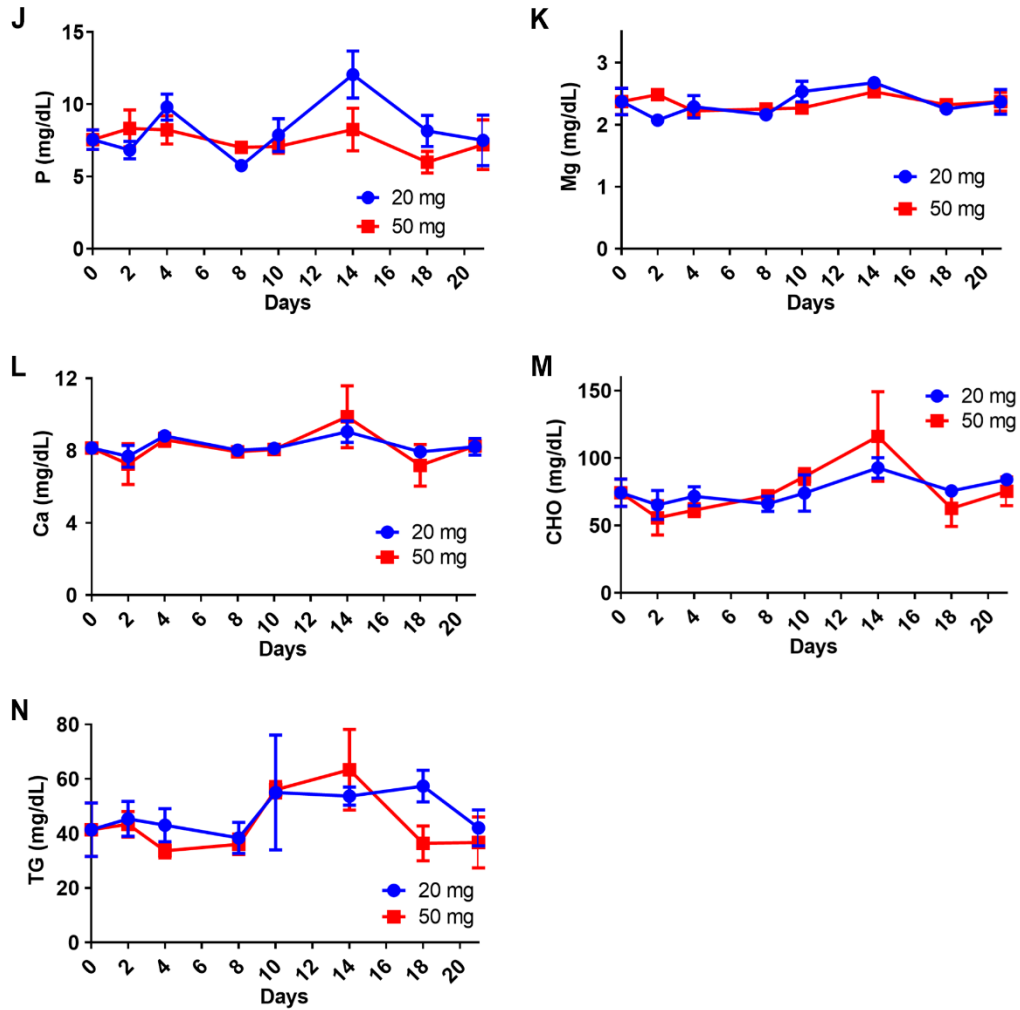

581

582 **Figure S2. Effects of rMSA injection on the major blood biochemical parameters**

583 (A-C) Dynamic total protein levels (A), total globulin levels (B), and the albumin/globulin ratio  
584 (C) within 1 day (left) and 2-21 days (right) after the injection with 20- or 50 mg rMSA per  
585 mouse (n = 3). (D-N) Dynamic levels of alanine transaminase (D), aspartate transaminase (E),  
586 alkaline phosphatase (F), lactate dehydrogenase (G), blood glucose (H), blood urea nitrogen (I),  
587 phosphorus (J), magnesium (K), calcium (L), cholesterol (M), and triglyceride (N) within 2-21  
588 days after the injection with 20- or 50 mg rMSA per mouse (n = 3). All graphs represent mean  
589 with SEM.

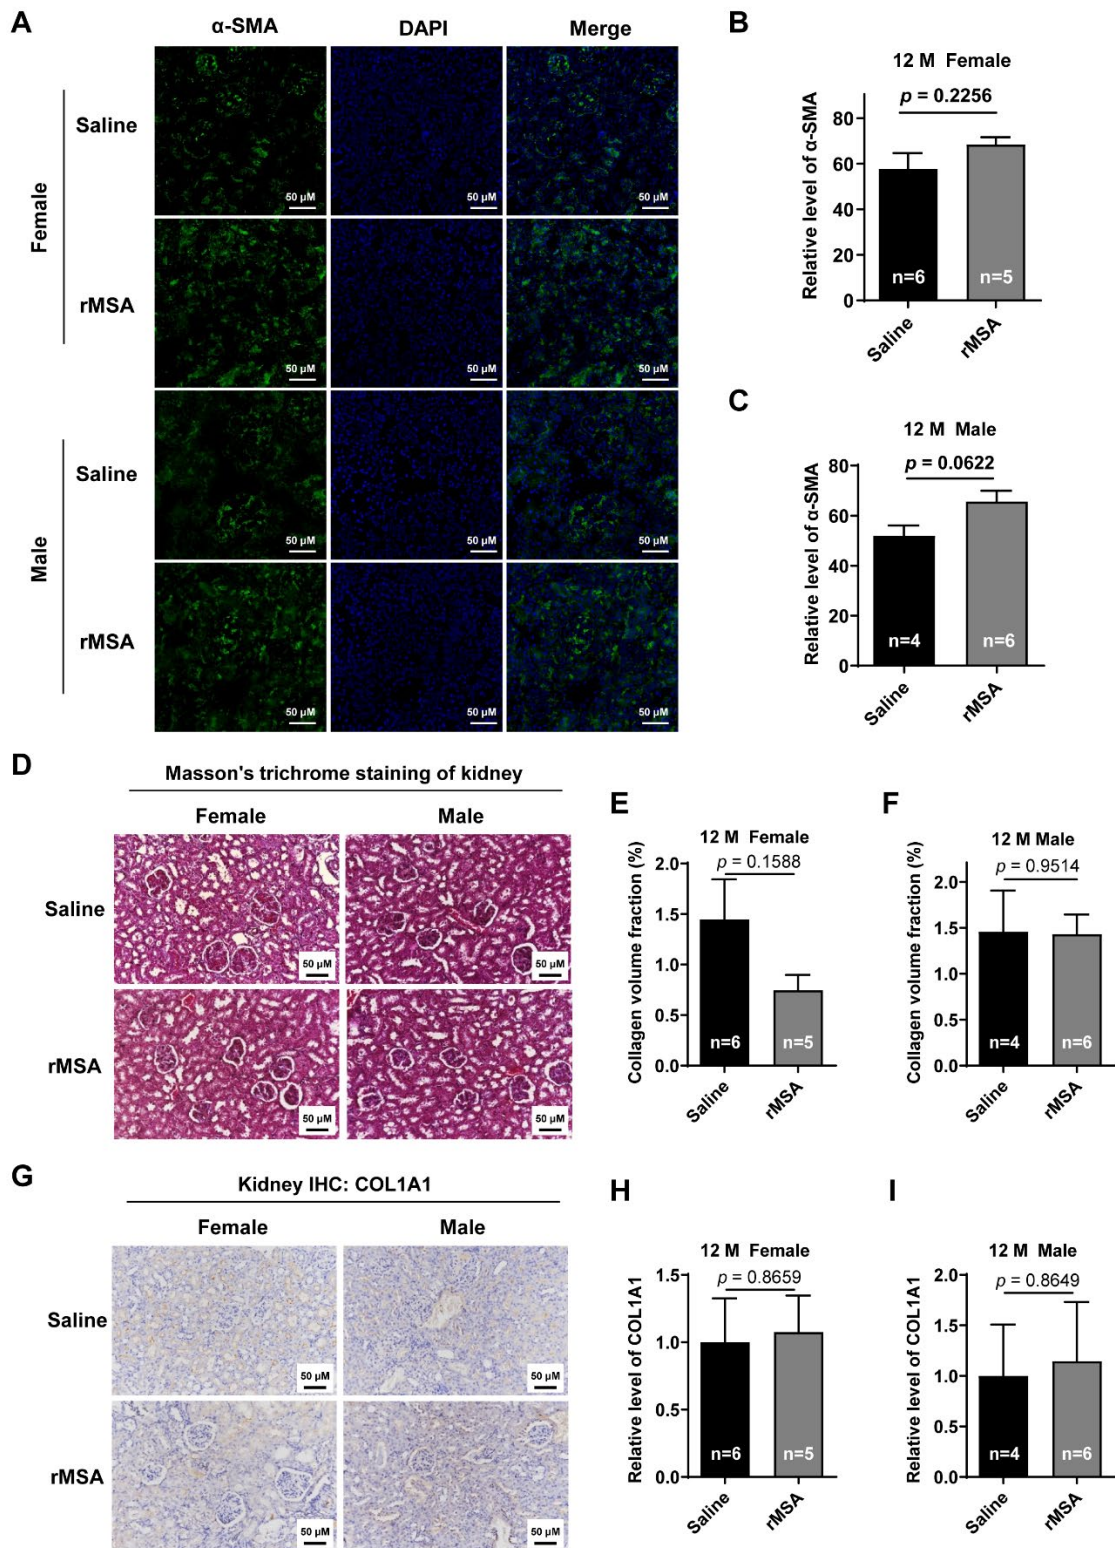

590

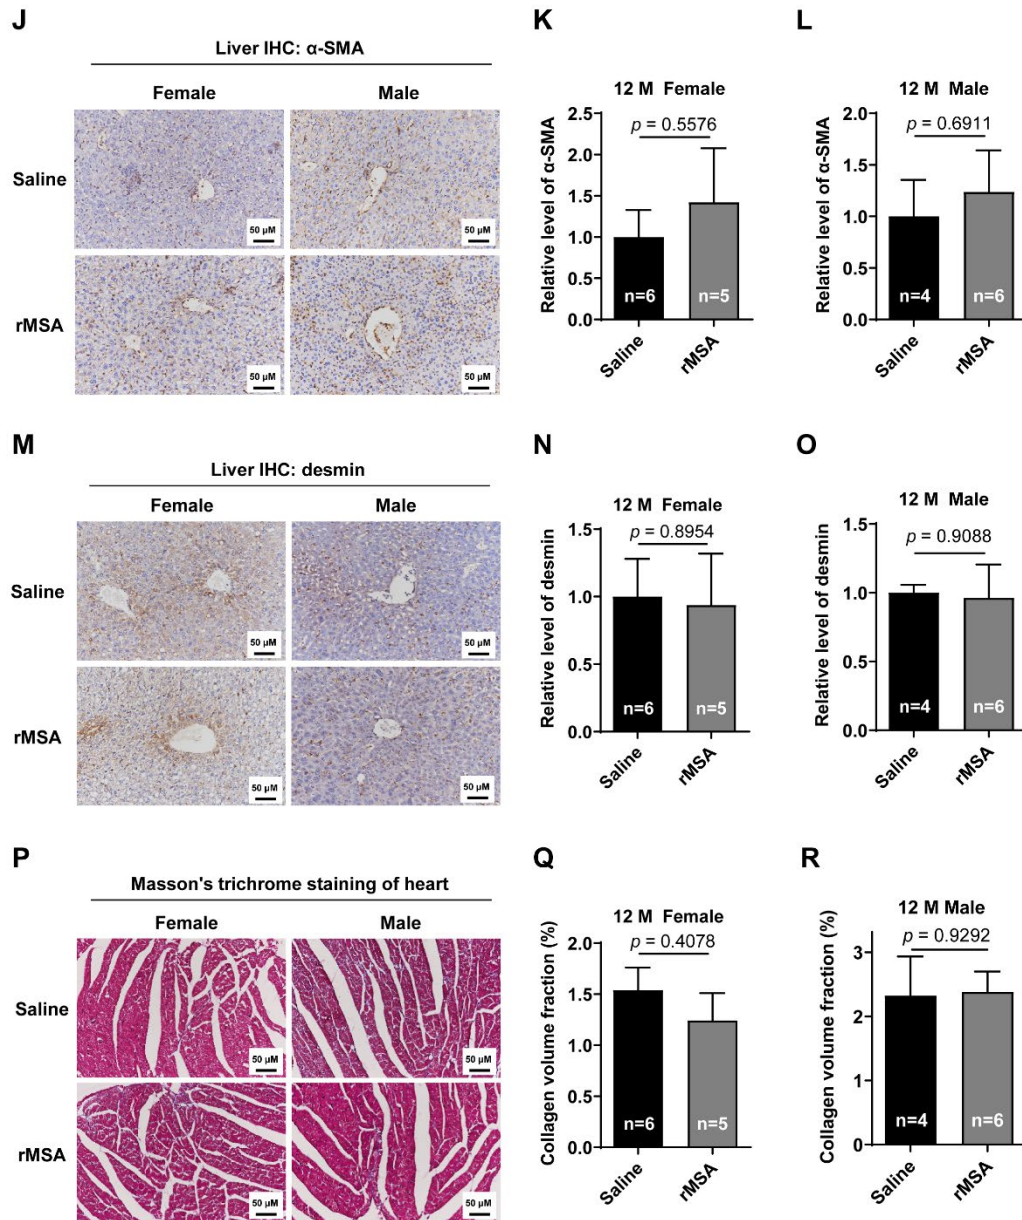

591

592 **Figure S3. Effects of rMSA injection on the fibrosis level of kidney, liver and heart**

593 (A) The representative images of  $\alpha$ -SMA in mice kidney. Scale bar, 50  $\mu$ m. (B and C) The  
 594 quantitative results of  $\alpha$ -SMA level in female (B) and male (C) mice. (D) The Masson's  
 595 trichrome staining of mice kidney. Scale bar, 50  $\mu$ m. (E and F) The collagen volume fraction  
 596 of the kidney in female (E) and male (F) mice. (G) The immunohistochemical staining for  
 597 COL1A1 in mice kidney. Scale bar, 50  $\mu$ m. (H and I) The relative level of COL1A1 in female  
 598 (H) and male (I) mice. (J) The immunohistochemical staining for  $\alpha$ -SMA in mice liver. Scale  
 599 bar, 50  $\mu$ m. (K and L) The relative level of  $\alpha$ -SMA in female (K) and male (L) mice. (M) The  
 600 immunohistochemical staining for desmin in mice liver. Scale bar, 50  $\mu$ m. (N and O) The  
 601 relative level of desmin in female (N) and male (O) mice. (P) The Masson's trichrome staining
